# Supplementary material for: A Nationwide Web-Based Survey of Neuroradiologists’ Perceptions of Artificial Intelligence Software for Neuro-Applications in Korea
Source: PubMed Central journal article supplement — Korean J Radiol. 2023 Apr 19;24(5):454–64. doi: 10.3348/kjr.2022.0905 (PMC10157324; doi:10.3348/kjr.2022.0905), 2023-04-19
Supplement: kjr-24-454-s001.pdf [file kjr-24-454-s001.pdf]

## SUPPLEMENTS

**Supplementary Table 1.** Questionnaire

| Question                                                                                                                                               | Response                                                                                                                                                                                                                                                                                                                                                                          |
|--------------------------------------------------------------------------------------------------------------------------------------------------------|-----------------------------------------------------------------------------------------------------------------------------------------------------------------------------------------------------------------------------------------------------------------------------------------------------------------------------------------------------------------------------------|
| 1. What is your age?                                                                                                                                   | 20–29 years<br>30–39 years<br>40–49 years<br>50–59 years<br>> 60 years                                                                                                                                                                                                                                                                                                            |
| 2. What is your gender?                                                                                                                                | Male<br>Female                                                                                                                                                                                                                                                                                                                                                                    |
| 3. How many years have you been practicing as a neuroradiologist?                                                                                      | < 5<br>5–10<br>10–20<br>20–30<br>> 30                                                                                                                                                                                                                                                                                                                                             |
| 4. In what type of hospital do you work?                                                                                                               | Academic<br>Non-academic<br>Remote reading                                                                                                                                                                                                                                                                                                                                        |
| 5. What is your professional title?                                                                                                                    | Professor<br>Fellow<br>Not affiliated with a university                                                                                                                                                                                                                                                                                                                           |
| 6. Have you ever received any lectures or training related to AI?                                                                                      | Yes<br>No                                                                                                                                                                                                                                                                                                                                                                         |
| 7. Have you ever conducted research related to AI?                                                                                                     | Yes<br>No                                                                                                                                                                                                                                                                                                                                                                         |
| 8. How much do you agree with the question “I feel familiar with AI programs”?                                                                         | Strongly agree<br>Agree<br>Neither agree nor disagree<br>Disagree<br>Strongly disagree                                                                                                                                                                                                                                                                                            |
| 9. Do you agree that AI is currently helpful in healthcare?                                                                                            | Strongly agree<br>Agree<br>Neither agree nor disagree<br>Disagree<br>Strongly disagree                                                                                                                                                                                                                                                                                            |
| 10. Do you think AI could replace the role of a radiologist in the future?                                                                             | Strongly agree<br>Agree<br>Neither agree nor disagree<br>Disagree<br>Strongly disagree                                                                                                                                                                                                                                                                                            |
| 11. How long do you think it will take for AI to be useful in practice?                                                                                | < 5 years<br>5–10 years<br>10–20 years<br>> 20 years                                                                                                                                                                                                                                                                                                                              |
| 12. Do you think AI will pose a threat to the role of radiologists?                                                                                    | Strongly agree<br>Agree<br>Neither agree nor disagree<br>Disagree<br>Strongly disagree                                                                                                                                                                                                                                                                                            |
| 13. How much do you think AI will be able to play the role of a radiologist in 10 years?                                                               | All<br>Most of<br>In some degree<br>A little<br>None                                                                                                                                                                                                                                                                                                                              |
| 14. How do you think using AI in the future will help a radiologist? Choose two options that you think are the most relevant.                          | Helps increase reading accuracy and reduce errors<br>Reduces time spent on repetitive tasks<br>Helps establish consistent diagnosis and treatment policies<br>Assists in evidence-based decision making<br>Reduce the cost<br>Helps to exclude of patients with normal findings<br>Etc.                                                                                           |
| 15. As a radiologist, how prepared do you feel introducing AI?                                                                                         | Very well<br>In some degree<br>Neither yes nor no<br>A little<br>None                                                                                                                                                                                                                                                                                                             |
| 16. What concerns you most about the introduction of AI? Choose two options that you think are the most relevant.                                      | Reducing the role of radiologists<br>Incorrect decision making due to machine error<br>Security and privacy issues for medical information<br>Questions about the basis of AI’s judgment<br>AI development companies take the lead in healthcare<br>Etc.                                                                                                                          |
| 17. Are you willing to purchase AI software or request a purchase to your hospital?                                                                    | Never purchased before and never will<br>Never purchased before, but have intention to buy in the future<br>Have purchased before, but have no intention to buy in the future<br>Have purchased before and will continue to buy<br>Don’t know                                                                                                                                     |
| 18. Have you ever used AI software for clinical or research purposes?                                                                                  | Yes<br>No                                                                                                                                                                                                                                                                                                                                                                         |
| 19. How often do you use AI software?                                                                                                                  | Everyday<br>At least once a week<br>At least once a month<br>Etc.                                                                                                                                                                                                                                                                                                                 |
| 20. How many AI software packages have you used?                                                                                                       | 1<br>2<br>3<br>4<br>> 5                                                                                                                                                                                                                                                                                                                                                           |
| 21. How long have you been using AI software?                                                                                                          | < 1 year<br>1–3 years<br>3–5 years<br>> 5 years                                                                                                                                                                                                                                                                                                                                   |
| 22. How did you use the AI software (purchase channel)?                                                                                                | Personally bought<br>Purchased in an institution<br>Used demo program<br>Participated in development of program                                                                                                                                                                                                                                                                   |
| 23. Which AI software have you used? Choose all.                                                                                                       | Diagnosis of Alzheimer’s or mild cognitive impairment<br>Detection, classification, and visualization of intracranial hemorrhage<br>Detection, visualization and inference the time of cerebral infarction<br>Measure and analysis of extent of brain tumor<br>Diagnosis of cerebral aneurysm or cerebrovascular stenosis/obstruction<br>Diagnosis of Parkinson’s disease<br>Etc. |
| 24. Which AI software needs the most improvement or development?                                                                                       | Diagnosis of Alzheimer’s or mild cognitive impairment<br>Detection, classification, and visualization of intracranial hemorrhage<br>Detection, visualization and inference the time of cerebral infarction<br>Measure and analysis of extent of brain tumor<br>Diagnosis of cerebral aneurysm or cerebrovascular stenosis/obstruction<br>Diagnosis of Parkinson’s disease<br>Etc. |
| 25. Do you agree that current AI software helps you make clinical decisions?                                                                           | Strongly agree<br>Agree<br>Neither agree nor disagree<br>Disagree<br>Strongly disagree                                                                                                                                                                                                                                                                                            |
| 26. In a situation where radiologists are unavailable, do you think that AI software can help clinicians make decisions?                               | Strongly agree<br>Agree<br>Neither agree nor disagree<br>Disagree<br>Strongly disagree                                                                                                                                                                                                                                                                                            |
| 27. In what ways do you think AI software is helpful?*                                                                                                 | Improving accuracy<br>Reduced reading time<br>Ensuring consistency<br>Research applicability                                                                                                                                                                                                                                                                                      |
| 28. Do you think that coordination between radiologists is essential to improve the performance of AI software?                                        | Strongly agree<br>Agree<br>Neither agree nor disagree<br>Disagree<br>Strongly disagree                                                                                                                                                                                                                                                                                            |
| 29. Do you agree that AI programs are useful in classifying normal and abnormal findings so that radiologists only read images classified as abnormal? | Strongly agree<br>Agree<br>Neither agree nor disagree<br>Disagree<br>Strongly disagree                                                                                                                                                                                                                                                                                            |
| 30. Do you think it is essential to incorporate AI into the curricula of medical schools and hospital training?                                        | Strongly agree<br>Agree<br>Neither agree nor disagree<br>Disagree<br>Strongly disagree                                                                                                                                                                                                                                                                                            |

Questions asked in an online survey regarding artificial intelligence (AI). The answers to questions 8–10, 12, 15, 25, 26, and 28–30 were assessed using a five-point Likert scale (1 = strongly disagree to 5 = strongly agree). \*For each question, participants were asked to choose from five options: very helpful, helpful, neither yes or no, little helpful, and not helpful

**Supplementary Table 2.** Subgroup Comparison on the Attitude toward Artificial Intelligence in 73 Respondents

|                                | Feeling of Familiarity | Feeling of Being Prepared | Posing a Threat to the Job | Current Usefulness | Expectation of Replacing a Radiologist in the Future |
|--------------------------------|------------------------|---------------------------|----------------------------|--------------------|------------------------------------------------------|
| Age <sup>†</sup>               | 0.141 (3 vs. 3)        | 0.175 (2 vs. 3)           | 0.313 (3 vs. 3)            | 0.553 (4 vs. 4)    | 0.029* (2 vs. 3)                                     |
| Sex <sup>‡</sup>               | 0.161 (3 vs. 3)        | 0.146 (3 vs. 2)           | 0.373 (4 vs. 3)            | 0.375 (4 vs. 3)    | 0.156 (3 vs. 3)                                      |
| Years of practice <sup>§</sup> | 0.833 (3 vs. 3)        | 0.761 (2 vs. 3)           | 0.085 (3 vs. 3)            | 0.879 (4 vs. 4)    | 0.011* (2 vs. 4)                                     |
| Type of hospital <sup>  </sup> | 0.198 (3 vs. 2)        | 0.043* (3 vs. 2)          | 0.456 (3 vs. 4)            | 0.001* (4 vs. 2)   | 0.793 (3 vs. 4)                                      |
| Type of position <sup>¶</sup>  | 0.441 (3 vs. 3)        | 0.088 (3 vs. 2)           | 0.888 (3 vs. 4)            | 0.176 (4 vs. 3)    | 0.822 (3 vs. 3)                                      |

The number in parentheses is the median value of each group. Data are *P* values with the results with nominal *P* < 0.05 are asterisked (\*), <sup>†</sup>Age group was divided into group with younger than 40 years old versus over 40 years old, <sup>‡</sup>In sex, the former is male and the latter female, <sup>§</sup>Year of practice was divided into group with less than 10 years of experience versus more than 10 years, <sup>||</sup>Type of hospital was divided into academic versus non-academic hospital, <sup>¶</sup>Type of position was divided into professor versus non-professor
